# Supplementary material for: Testing Ion Exchange Resin for quantifying bulk and throughfall deposition of macro and micro-elements on forests
Source: Copernicus journal article supplement (doi:10.5194/amt-2024-46), 2024-04-15
Supplement: Supplementary file 1 [file amt-2024-46-supplement.pdf]

# **Technical note: Testing Ion Exchange Resin for quantifying bulk and throughfall deposition of macro and micro-elements on forests**

**Supplementary information**

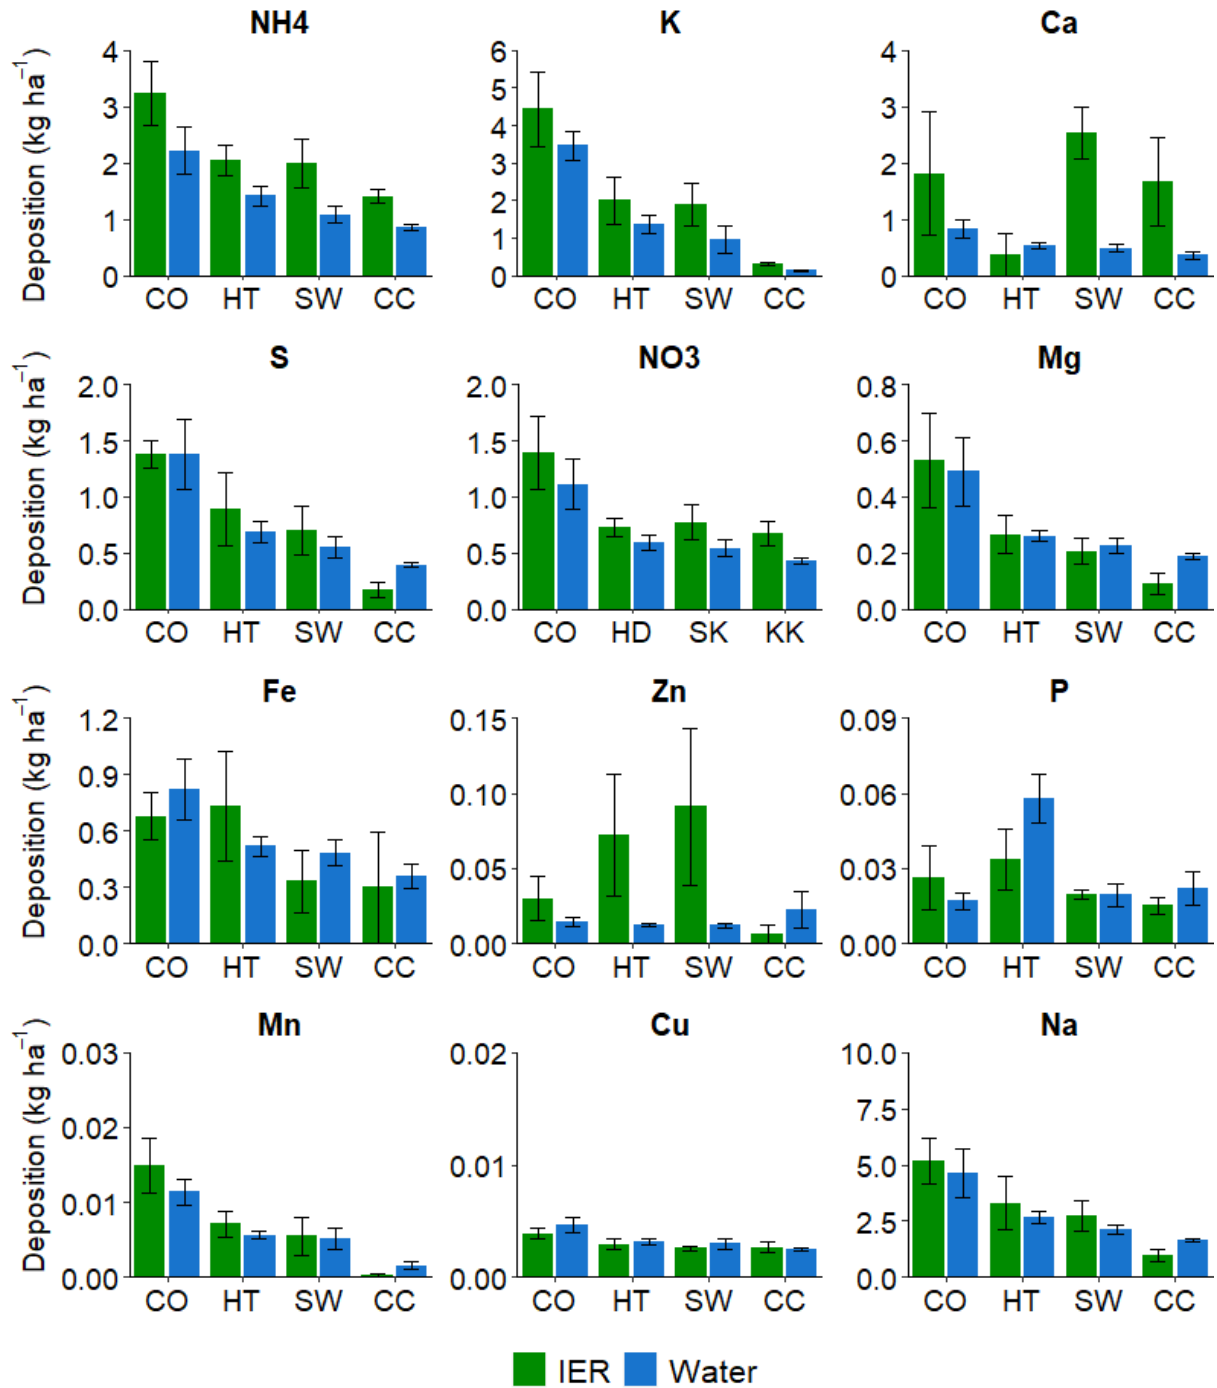

Figure S1: Deposition estimates of the IER-method ( $\text{kg ha}^{-1}$ ) and the water-method ( $\text{kg ha}^{-1}$ ) in the treatments control (CO), high-thinning (HT), shelterwood (SW) and clearcut (CC) for a 10-week measurement period.

**Table S1: Conversion factor to calculate total deposition within a forest stand based on bulk precipitation data. Original data underneath the multiplication factors were corrected for canopy uptake of NH<sub>4</sub> and NO<sub>3</sub> and canopy leaching of Mg, Ca, K and Mn except for the inert ions Na, SO<sub>4</sub>, Zn and Cu. The ion Na is in all cases used to calculate canopy leaching of Ca, Mg and K. Stem flow (SF) was only included for beech forest and one Douglas fir stand.**

| Species           | Na  | NH <sub>4</sub> | NO <sub>3</sub> | K   | M   | SO <sub>4</sub> | PO <sub>4</sub> | Ca  | Mn  | Zn  | Cu  | Country        | SF  | Source                       |
|-------------------|-----|-----------------|-----------------|-----|-----|-----------------|-----------------|-----|-----|-----|-----|----------------|-----|------------------------------|
| Beech             | 1.2 | 1.2             | 1.2             | 1.2 | 1.2 | 1.2             | 1.3             | 1.2 | 1.2 |     |     | Germany        | Yes | (Talkner et al., 2010)       |
| Beech             |     |                 |                 |     |     | 1.6             |                 |     |     |     |     |                |     | (Augusto et al., 2002)       |
| Beech             | 2.4 | 3.6             | 2.0             | 3.1 | 2.4 | 4.8             |                 | 2.4 |     |     |     | Belgium        | Yes | (Adriaenssens et al., 2012)  |
| Beech             | 1.2 |                 |                 |     |     | 1.6             |                 |     |     |     |     | Czech Republic | Yes | (Růžek et al., 2019)         |
| Beech             | 1.2 |                 |                 |     |     | 1.2             |                 |     |     | 1.1 | 2.1 | Poland         | Yes | (Kowalska et al., 2016)      |
| Douglas fir       | 2.3 | 2.3             | 2.3             | 2.2 | 2.2 | 2.3             | 2.1             | 2.4 |     |     |     | France         | Yes | (Marques et al., 1997)       |
| Douglas fir       | 2.3 |                 |                 | 1.4 | 1.8 | 3.3             |                 | 1.5 |     |     |     | Netherlands    |     | (Van Ek and Draaijers, 1994) |
| Douglas fir       | 2.3 | 3.7             | 2.1             | 2.3 | 2.3 | 3.6             | 2.5             | 2.3 |     |     |     | Netherlands    | Yes | (Draaijers et al., 1997)     |
| Coniferous forest |     |                 |                 |     |     |                 |                 |     |     | 2.4 | 2.6 |                |     | (De Vries and Bakker, 1996)  |
| Scots pine        | 1.1 |                 |                 | 1.2 | 1.2 | 1.6             |                 | 1.1 |     |     |     | Poland         | No  | (Kozłowski et al., 2020)     |
| Scots pine        | 2.3 |                 |                 | 1.5 | 1.9 |                 |                 | 1.6 |     |     |     | Netherlands    | No  | (Van Ek and Draaijers, 1994) |
| Scots pine        | 2.0 |                 |                 |     |     | 1.5             |                 |     | 1.1 | 1.3 |     | Poland         | No  | (Kowalska et al., 2016)      |
| Corsican pine     | 1.5 | 6.5             | 3.5             | 3.4 | 1.9 |                 |                 | 1.4 |     |     |     | Belgium        | No  | (De Schrijver et al., 2004)  |
| Average           |     |                 |                 |     |     |                 |                 |     |     |     |     |                |     |                              |
| Beech             | 1.5 | 2.4             | 1.6             | 2.2 | 1.8 | 2.3             | 1.3             | 1.8 | 1.2 |     |     |                |     |                              |
| Douglas fir       | 2.3 | 3.0             | 2.2             | 2.0 | 2.1 | 3.1             | 2.3             | 2.1 |     | 2.4 | 2.6 |                |     |                              |
| Scots pine        | 1.7 | 6.5             | 3.5             | 2.0 | 1.7 | 1.6             |                 | 1.4 |     |     |     |                |     |                              |

N.B. The bulk throughfall deposition of SO<sub>4</sub><sup>2-</sup> was assumed to be not influenced by canopy exchange as the stomatal uptake of SO<sub>2</sub> is balanced by foliar leaching of SO<sub>4</sub><sup>2-</sup> (Draaijers and Erisman, 1995). However, Staelens et al. (2007) estimated that canopy leaching contributed 7% to the combined bulk throughfall and stemflow of SO<sub>4</sub><sup>2-</sup> which was in line with the findings of Potter et al. (1991). Canopy exchange of Al and Cu are neglectable as both elements in deposition is found in a colloidal fraction and almost entirely complexed by DOC (Gandois et al., 2010). The free metal ion forms of Zn (on average 30%) do interact with the canopy however concentration is only slightly increased or decreased (Gandois et al., 2010).

<sup>1</sup> measured under a single tree, therefore not representative for a forest stand.

**Table S2: Overview of the columns (n = 45) prepared for the different laboratory tests.**

| Pre-treatment | Loading                   | n  | Used for adsorption tests | Used for extraction tests |
|---------------|---------------------------|----|---------------------------|---------------------------|
| Heat          | 1 * macro- and microfluid | 3  | Yes                       | Yes                       |
| Drought       | 1 * macro- and microfluid | 3  | Yes                       | Yes                       |
| Frost         | 1 * macro- and microfluid | 3  | Yes                       | Yes                       |
| None          | 1 * macro- and microfluid | 30 | Yes, 3 columns            | Yes                       |
| None          | 2 * macro- and microfluid | 3  | Yes                       | No                        |
| None          | 3 * macro- and microfluid | 3  | Yes                       | No                        |

**Table S3: ANOVA F and P values for HCl extraction of different molarities, pre-treatments (DW or FW) and different extraction types (Drip or Shake-Drip).**

|                           | DF | F-value | P-value  |
|---------------------------|----|---------|----------|
| Element                   | 9  | 250     | < 0.0001 |
| Pre-treatment             | 1  | 68      | < 0.0001 |
| Molarity                  | 6  | 16      | < 0.0001 |
| Extraction type           | 1  | 4.2     | 0.043    |
| Element * Pre-treatment   | 9  | 19      | < 0.0001 |
| Element * Molarity        | 54 | 7.8     | < 0.0001 |
| Element * Extraction type | 9  | 2.2     | 0.025    |

**Table S4: Elemental concentrations under detection limit (%) after 10-week long field sampling of the atmospheric bulk (throughfall) deposition in the Netherlands. Elemental concentrations were often under detection limit for the original method (Org), especially for the treatments (TM) shelterwood (SW) and clearcut (CC) and less often for the treatments control (CO) and high thinning (HT). For the Ion Exchange resin method (IER) values were less often under detection limit.**

| TM | Method | Ca  | Cu  | Fe  | K   | Mg | Mn  | Na | P   | S | Zn  | NH4 | NO3 |
|----|--------|-----|-----|-----|-----|----|-----|----|-----|---|-----|-----|-----|
| CO | Org    | 83  | 100 | 100 | 0   | 0  | 50  | 0  | 100 | 0 | 83  | 0   | 0   |
| HT | Org    | 100 | 100 | 100 | 0   | 0  | 100 | 0  | 100 | 0 | 100 | 0   | 0   |
| SW | Org    | 100 | 100 | 100 | 50  | 17 | 100 | 0  | 100 | 0 | 100 | 0   | 0   |
| CC | Org    | 100 | 100 | 100 | 100 | 33 | 100 | 0  | 100 | 0 | 83  | 0   | 0   |
| CO | IER    | 0   | 0   | 20  | 0   | 0  | 0   | 0  | 40  | 0 | 0   | 0   | 0   |
| HD | IER    | 0   | 0   | 40  | 0   | 0  | 0   | 0  | 20  | 0 | 0   | 0   | 0   |
| SK | IER    | 0   | 0   | 17  | 0   | 0  | 0   | 0  | 0   | 0 | 17  | 0   | 0   |
| KK | IER    | 0   | 0   | 0   | 0   | 0  | 0   | 0  | 60  | 0 | 20  | 0   | 0   |
